# Supplementary material for: Mortality in HIV-Infected Alcohol and Drug Users in St. Petersburg, Russia
Source: PubMed Central journal article supplement (PMC5127495; doi:10.1371/journal.pone.0166539), 2016-11-29
Supplement: pone.0166539.s002.pdf [file pone.0166539.s002.pdf]

# Healthy Relationships Intervention – Russia

## BASELINE QUESTIONNAIRE

### RUSSIAN TRANSLATION

#### Table of Contents

| <u>Section</u> | <u>Instrument</u>         |
|----------------|---------------------------|
| A              | Demographics              |
| C              | ART Medication History    |
| D              | Sex Practices             |
| F              | HIV Stigma                |
| J              | Depression (BDI II)*      |
| L              | Alcohol Use (30 day TLFB) |
| N              | Drug Use                  |
| O              | Involvement with Police   |
| P              | Overdose                  |
| Q              | Suicide                   |
| T              | SF12v2 Health Survey      |

\* Sections to be self-administered

The following domains were also assessed in this study, but as no data were included in this analysis, the specific questions were not provided here.

|                                        |                 |
|----------------------------------------|-----------------|
| HIV testing & HCV Diagnosis            | Trauma*         |
| Sexually Transmitted Diseases          | HIV Risk*       |
| CIDI SF: Alcohol Dependence (12 Month) | HIV Disclosure* |
| CIDI SF: Drug Dependence (12 Month)    | Social Support  |
| Sensation Seeking / Risk Taking        |                 |

## Раздел А. Демографические данные

1. Образование (выберите один вариант): (ПОКАЖИТЕ КАРТОЧКУ №1)

- 1  9 классов и меньше
- 2  11 классов
- 3  колледж/ПТУ
- 4  Университет/ВУЗ

2. Наиболее характерная занятость за последние 3 года? (ПОКАЖИТЕ КАРТОЧКУ №2)

(**Внимание:** Ответ должен отражать наиболее длительную занятость за последние 3 года, а не последний вариант. Если подходит несколько вариантов, выберите наиболее близкий к настоящему времени).

- 1  постоянная работа (включая официальную и неофициальную работу)
- 2  непостоянная работа (включая официальную и неофициальную работу)
- 3  Безработный
- 4  учащийся
- 5  В заключении, больнице, закрытой реабилитации

3. Семейное положение в настоящий момент: (ПОКАЖИТЕ КАРТОЧКУ №3)

- 1  В браке/живет с партнером
- 2  Холост, никогда не был женат/замужем
- 3  В настоящее время не состоит в браке/не живет с партнером (например, вдовец/вдова, раздельное проживание, в разводе)

4. Типичное проживание (за последние 3 года): (ПОКАЖИТЕ КАРТОЧКУ №4)

(**Внимание:** выберите варианты, наиболее отражающие типичное проживание за последние 3 года. Если было несколько одинаковых по времени вариантов, выберите наиболее близкий к настоящему времени).

- 1  С партнером и детьми
- 2  Только с партнером
- 3  Только с детьми
- 4  С родителями
- 5  С другими членами семьи
- 6  С друзьями
- 7  Один
- 8  В заключении/больнице/реабилитации
- 9  нет постоянного проживания

5. Живете ли Вы с кем-либо, имеющим алкогольные проблемы в настоящее время?

- 0  нет
- 1  да

6. Живете ли Вы с кем-либо, употребляющим наркотики или медицинские препараты, не прописанные врачом?

- 0  нет
- 1  да

7. Находились ли Вы в условиях, ограничивающих личную свободу, за последние 30 дней? (Для стационарных пациентов: за последние 30 дней до госпитализации)

Можете выбрать несколько вариантов. (ПОКАЖИТЕ КАРТОЧКУ №5)

1  нет

2  в тюрьме

3  госпитализация для лечения алкоголизма или наркомании

4  госпитализация из-за проблем с физическим здоровьем

5  госпитализация из-за проблем с психическим здоровьем

6  другое: \_\_\_\_\_ (Внимание: место, где теоретически

невозможен доступ к алкоголю и наркотикам.)

8. Сколько месяцев Вы провели в заключении за всю жизнь? (ПОКАЖИТЕ КАРТОЧКУ №6)

1  не был в заключении

2  < 1 месяца

3  ≥ 1 месяца, но < 1 года

4  ≥ 1 года, но < 5 лет

5  ≥ 5 лет

9\*. Лечили ли Вас **когда-нибудь** по поводу алкогольных проблем?

0  нет → ПЕРЕЙДИТЕ К ВОПРОСУ №10

1  да

9а\*. Получали ли Вы **за последний год** лечение по поводу алкогольных проблем?

0  нет

1  да

10\*. Лечили ли Вас **когда-нибудь** по поводу наркомании?

0  нет → ПЕРЕЙДИТЕ К РАЗДЕЛУ Б

1  да

10а\*. Получали ли Вы **за последний год** лечение по поводу наркомании?

0  нет

1  да

\* включая дезинтоксикацию, дома на полпути, стационарное или амбулаторное консультирование, АА и НА (если 3 и более посещения в течение 1 месяца).

## Раздел В. Соблюдение приверженности к антиретровирусной терапии

1. Принимали ли Вы **когда-нибудь** антиретровирусные препараты для лечения ВИЧ?

нет..... 0 ПЕРЕЙДИТЕ К РАЗДЕЛУ Г

да..... 1

2. Какие из следующих препаратов для лечения ВИЧ Вы принимали? [ПОКАЖИТЕ КАРТУ С КАРТИНКАМИ И НАЗВАНИЯМИ]

|     |            |     |                    |     |           |
|-----|------------|-----|--------------------|-----|-----------|
| ABC | Зиаген     | DRV | Презиста           | TDF | Вирид     |
| ADV | Адефовир   | EPZ | Эпзиком            | TNV | Тенофовир |
| APV | Агенераза  | EFV | Сустива            | TPV | Аптивус   |
| ATR | Атрипла    | FTC | Эмтрива            | TRI | Тризивир  |
| ATV | Рейац      | IDV | Криксиван          | TRU | Трувада   |
| AZT | Ретровир   | LPV | Калетра            | ЗТС | Эпивир    |
| COM | Комбивир   | NIK | Никовир (фосфазид) | 908 | Лексива   |
| d4T | Зерит      | NFV | Вирацепт           | OT1 | Другой1   |
| ddC | НIVID      | NVP | Вирамун            | OT2 | Другой2   |
| ddI | Видекс     | RTV | Норвир             | OT3 | Другой3   |
| DEC | DDI EC     | SQV | Инвираза/фортоваза |     |           |
| DLV | Рескриптор | T20 | Фузеон             |     |           |

Принимаете ли Вы сейчас  
эти препараты?

нет да

а. \_\_\_\_\_ 0 1

(впишите код)

б. \_\_\_\_\_ 0 1

(впишите код)

в. \_\_\_\_\_ 0 1

(впишите код)

г. \_\_\_\_\_ 0 1

(впишите код)

д. \_\_\_\_\_ 0 1

(впишите код)

е. \_\_\_\_\_ 0 1

(впишите код)

ж. \_\_\_\_\_ 0 1

(впишите код)

з. \_\_\_\_\_ 0 1

(впишите код)

Если код OT1, OT2 или OT3, укажите название препарата:

OT1: \_\_\_\_\_

OT2: \_\_\_\_\_

OT3: \_\_\_\_\_

## Раздел Г. Половое поведение

Вопросы последующих разделов будут касаться Вашего полового поведения и употребления наркотиков. Иногда разговор о сексуальной жизни вызывает смущение. [Обсудите конфиденциальность, беспокойство по этому поводу, что участник испытывает перед обсуждением этого раздела].

Этот раздел содержит вопросы о Вашей недавней сексуальной жизни. Перед тем как мы к нему перейдем, важно, чтобы мы договорились об употреблении одних и тех же слов и их значений. Когда я говорю о половых контактах, я имею в виду вагинальный и анальный половой контакт.

Большинство вопросов относятся к событиям прошедших трех месяцев или 90 дней для стационарных пациентов - трех месяцев или 90 дней до госпитализации), то есть начиная с (ВЫЧИСЛИТЕ ДАТУ). *Покажите участнику календарь, чтобы помочь вспомнить об этом времени.*

Вспомните об этом периоде, начиная с (ДАТА), о местах, где Вы бывали, о событиях и людях, с которыми Вы встречались. Были ли за это время, начиная с (ДАТА) до сегодняшнего дня какие-то запоминающиеся события? Есть ли у Вас вопросы?

Теперь вспомните о Вашей половой жизни за прошедшие 3 месяца, начиная с (ДАТА). Эти вопросы касаются половой жизни, которую вы вели в этот период. Иногда бывает полезно вспомнить о каких-то особых событиях, датах, произошедших за это время. Посмотрите в календарь, вспомните события за прошедшие 3 месяца и скажите, пожалуйста:

1. Были ли у Вас вагинальные или анальные половые контакты за прошедшие 3 месяца (для стационарных пациентов – за прошедшие 3 месяца до госпитализации)?

|     |   |
|-----|---|
| Нет | 0 |
| Да  | 1 |

*Если НЕТ, спросите: «Итак, у Вас не было вагинальных и анальных половых контактов с (ДАТА) до сегодняшнего дня?»*

*Если половых контактов не было, перейдите к следующему разделу.*

*Если половые контакты были, продолжайте задавать вопросы.*

2. Сколько половых партнеров у Вас было за это время, с (ДАТА) до сегодняшнего дня?  
\_\_\_\_\_ количество партнеров

Сейчас вспомните обо всех половых партнерах, с которыми у Вас были сексуальные отношения за прошедшие 3 месяца, начиная с партнера, с которым у Вас были самые недавние половые отношения. Пожалуйста, назовите мне их имена, чтобы я мог включить их в вопросы. Пожалуйста, назовите только их имена или **инициалы**, чтобы мы могли назвать их в последующих вопросах. НЕ НАЗЫВАЙТЕ ИХ ФАМИЛИИ. Если Вы не помните имен, можете называть их по номерам.

Как Вы можете охарактеризовать этого человека: (ПОКАЖИТЕ КАРТОЧКУ №7)

**ОСНОВНОЙ ИЛИ ПОСТОЯННЫЙ ПОЛОВОЙ ПАРТНЕР:** Человек, с которым у Вас имеются устойчивые отношения, с которым Вы часто вступаете в половой контакт, например, супруг(а), любовник/любовница, приятель или подруга. Вы можете считать нескольких партнеров основными или постоянными.

**НЕПОСТОЯННЫЙ ПАРТНЕР:** Человек, с которым у Вас были половые отношения однократно или несколько раз, но который не является постоянным половым партнером.

Инициалы                      выберите один вариант

|                      |                                                |                                         |
|----------------------|------------------------------------------------|-----------------------------------------|
| За. партнер 1: _____ | 1 <input type="checkbox"/> основной/постоянный | 2 <input type="checkbox"/> непостоянный |
| б. партнер 2: _____  | 1 <input type="checkbox"/> основной/постоянный | 2 <input type="checkbox"/> непостоянный |
| в. партнер 3: _____  | 1 <input type="checkbox"/> основной/постоянный | 2 <input type="checkbox"/> непостоянный |
| г. партнер 4: _____  | 1 <input type="checkbox"/> основной/постоянный | 2 <input type="checkbox"/> непостоянный |
| д. партнер 5: _____  | 1 <input type="checkbox"/> основной/постоянный | 2 <input type="checkbox"/> непостоянный |

Вопросы, касающиеся каждого из партнеров:

Пожалуйста, ответьте на вопросы, касающиеся (ПАРТНЕР 1).

4. А. Это (ПАРТНЕР 1) мужчина или женщина?

мужчина 1  
женщина 2

Б. Есть ли у (ПАРТНЕР 1) ВИЧ?

Нет 1  
Да 2  
Не знаю 3

В. За последние 3 месяца, начиная с (ДАТА), сколько раз у Вас были вагинальные или анальные половые контакты с (ПАРТНЕР 1)? \_\_\_\_\_

Г. Из этих \_\_\_\_\_ раз, Вы или он(а) когда-либо использовали презервативы?

Нет 0  
Да 1

Д. Если да, то сколько раз Вы или он(а) использовали презервативы? \_\_\_\_\_

Е. За прошедшие 3 месяца говорили ли Вы с этим партнером о:

1. наличии у Вас ВИЧ

Нет 0  
Да 1

2. наличии ВИЧ у Вашего партнера

Нет 0  
Да 1

3. использовании презервативов

Нет 0  
Да 1

Сейчас я попрошу Вас подумать о **прошедших 30 днях до госпитализации**, когда у Вас были половые контакты с (ПАРТНЕР 1). Вспомните, пожалуйста, где Вы находились, что происходило, и ответьте, пожалуйста, на вопросы, относящиеся к этому времени.

Ж. Имелись ли у Вас половые контакты с (ПАРТНЕР 1) за последние 30 дней?

Нет 0 →ПЕРЕЙДИТЕ К ВОПРОСАМ, КАСАЮЩИМСЯ ПАРТНЕРА №2  
Да 1

З. Употребляли ли Вы алкоголь или наркотики перед или во время половых контактов за последние 30 дней (до госпитализации) ?

Нет 0 →ПЕРЕЙДИТЕ К ВОПРОСАМ, КАСАЮЩИМСЯ ПАРТНЕРА №2  
Да 1

И. Если ДА, то какие наркотики Вы употребляли (выберите все подходящие и обведите)

|   |                                                                         | нет | да |
|---|-------------------------------------------------------------------------|-----|----|
| А | алкоголь                                                                | 0   | 1  |
| Б | Героин и другие опиаты (кодеин, метадон, фентанил, «белый китаец»)      | 0   | 1  |
| В | Психостимуляторы (джеф, эфедрин, амфетамин, метамфетамин, кокаин, крэк) | 0   | 1  |
| Г | Коноплю (гашиш, марихуану)                                              | 0   | 1  |
| Д | Клубные наркотики (экстази, ЛСД, ПиСиПи, кетамин)                       | 0   | 1  |

Сейчас я попрошу Вас ответить на вопросы, касающиеся (ПАРТНЕР 2).

5. А. Это (ПАРТНЕР 2) мужчина или женщина?

мужчина 1

женщина 2

Б. Есть ли у (ПАРТНЕР 2) ВИЧ?

Нет 1

Да 2

Не знаю 3

В. За последние 3 месяца, начиная с (ДАТА), сколько раз у Вас были вагинальные или анальные половые контакты с (ПАРТНЕР 2)? \_\_\_\_\_

Г. Из этих \_\_\_\_\_ раз, Вы или он(а) когда-либо использовали презервативы?

Нет 0

Да 1

Д. Если да, то сколько раз Вы или он(а) использовали презервативы? \_\_\_\_\_

Е. За прошедшие 3 месяца говорили ли Вы с этим партнером о:

1. наличии у Вас ВИЧ

Нет 0

Да 1

2. наличии ВИЧ у Вашего партнера

Нет 0

Да 1

3. использовании презервативов

Нет 0

Да 1

Сейчас я попрошу Вас подумать о **прошедших 30 днях до госпитализации**, когда у Вас были половые контакты с (ПАРТНЕР 2). Вспомните, пожалуйста, где Вы находились, что происходило, и ответьте, пожалуйста, на вопросы, относящиеся к этому времени.

Ж. Имелись ли у Вас половые контакты с (ПАРТНЕР 2) за последние 30 дней?

Нет 0 →ПЕРЕЙДИТЕ К ВОПРОСАМ, КАСАЮЩИМСЯ ПАРТНЕРА №3

Да 1

З. Употребляли ли Вы алкоголь или наркотики перед или во время половых контактов за последние 30 дней (до госпитализации) ?

Нет 0 →ПЕРЕЙДИТЕ К ВОПРОСАМ, КАСАЮЩИМСЯ ПАРТНЕРА №3

Да 1

И. Если ДА, то какие наркотики Вы употребляли (выберите все подходящие и обведите)

|   |                                                                         | нет | да |
|---|-------------------------------------------------------------------------|-----|----|
| А | алкоголь                                                                | 0   | 1  |
| Б | Героин и другие опиаты (кодеин, метадон, фентанил, «белый китаец»)      | 0   | 1  |
| В | Психостимуляторы (джеф, эфедрин, амфетамин, метамфетамин, кокаин, крэк) | 0   | 1  |
| Г | Коноплю (гашиш, марихуану)                                              | 0   | 1  |
| Д | Клубные наркотики (экстази, ЛСД, ПиСиПи, кетамин)                       | 0   | 1  |

Сейчас я попрошу Вас ответить на вопросы, касающиеся (ПАРТНЕР 3).

6. А. Это (ПАРТНЕР 3) мужчина или женщина?

мужчина 1

женщина 2

Б. Есть ли у (ПАРТНЕР 3) ВИЧ?

Нет 1

Да 2

Не знаю 3

В. За последние 3 месяца, начиная с (ДАТА), сколько раз у Вас были вагинальные или анальные половые контакты с (ПАРТНЕР 3)? \_\_\_\_\_

Г. Из этих \_\_\_\_\_ раз, Вы или он(а) когда-либо использовали презервативы?

Нет 0

Да 1

Д. Если да, то сколько раз Вы или он(а) использовали презервативы? \_\_\_\_\_

Е. За прошедшие 3 месяца говорили ли Вы с этим партнером о:

1. наличии у Вас ВИЧ

Нет 0

Да 1

2. наличии ВИЧ у Вашего партнера

Нет 0

Да 1

3. использовании презервативов

Нет 0

Да 1

Сейчас я попрошу Вас подумать о **прошедших 30 днях до госпитализации**, когда у Вас были половые контакты с (ПАРТНЕР 3). Вспомните, пожалуйста, где Вы находились, что происходило, и ответьте, пожалуйста, на вопросы, относящиеся к этому времени.

Ж. Имелись ли у Вас половые контакты с (ПАРТНЕР 3) за последние 30 дней?

Нет 0 →ПЕРЕЙДИТЕ К ВОПРОСАМ, КАСАЮЩИМСЯ ПАРТНЕРА №4

Да 1

З. Употребляли ли Вы алкоголь или наркотики перед или во время половых контактов за последние 30 дней (до госпитализации) ?

Нет 0 →ПЕРЕЙДИТЕ К ВОПРОСАМ, КАСАЮЩИМСЯ ПАРТНЕРА №4

Да 1

И. Если ДА, то какие наркотики Вы употребляли (выберите все подходящие и обведите)

|   |                                                                         | нет | да |
|---|-------------------------------------------------------------------------|-----|----|
| А | алкоголь                                                                | 0   | 1  |
| Б | Героин и другие опиаты (кодеин, метадон, фентанил, «белый китаец»)      | 0   | 1  |
| В | Психостимуляторы (джеф, эфедрин, амфетамин, метамфетамин, кокаин, крэк) | 0   | 1  |
| Г | Коноплю (гашиш, марихуану)                                              | 0   | 1  |
| Д | Клубные наркотики (экстази, ЛСД, ПиСиПи, кетамин)                       | 0   | 1  |

Сейчас я попрошу Вас ответить на вопросы, касающиеся (ПАРТНЕР 4).

7. А. Это (ПАРТНЕР 4) мужчина или женщина?

мужчина 1

женщина 2



**Б.** Есть ли у (ПАРТНЕР 4) ВИЧ?

|         |   |
|---------|---|
| Нет     | 1 |
| Да      | 2 |
| Не знаю | 3 |

**В.** За последние 3 месяца, начиная с (ДАТА), сколько раз у Вас были вагинальные или анальные половые контакты с (ПАРТНЕР 4)? \_\_\_\_\_

**Г.** Из этих \_\_\_\_\_ раз, Вы или он(а) когда-либо использовали презервативы?

|     |   |
|-----|---|
| Нет | 0 |
| Да  | 1 |

**Д.** Если да, то сколько раз Вы или он(а) использовали презервативы? \_\_\_\_\_

**Е.** За прошедшие 3 месяца говорили ли Вы с этим партнером о:

1. наличии у Вас ВИЧ

|     |   |
|-----|---|
| Нет | 0 |
| Да  | 1 |

2. наличии ВИЧ у Вашего партнера

|     |   |
|-----|---|
| Нет | 0 |
| Да  | 1 |

3. использовании презервативов

|     |   |
|-----|---|
| Нет | 0 |
| Да  | 1 |

Сейчас я попрошу Вас подумать о **прошедших 30 днях до госпитализации**, когда у Вас были половые контакты с (ПАРТНЕР 4). Вспомните, пожалуйста, где Вы находились, что происходило, и ответьте, пожалуйста, на вопросы, относящиеся к этому времени.

**Ж.** Имелись ли у Вас половые контакты с (ПАРТНЕР 4) за последние 30 дней?

|     |   |                                               |
|-----|---|-----------------------------------------------|
| Нет | 0 | →ПЕРЕЙДИТЕ К ВОПРОСАМ, КАСАЮЩИМСЯ ПАРТНЕРА №5 |
| Да  | 1 |                                               |

**З.** Употребляли ли Вы алкоголь или наркотики перед или во время половых контактов за последние 30 дней (до госпитализации) ?

|     |   |                                               |
|-----|---|-----------------------------------------------|
| Нет | 0 | →ПЕРЕЙДИТЕ К ВОПРОСАМ, КАСАЮЩИМСЯ ПАРТНЕРА №5 |
| Да  | 1 |                                               |

**И.** Если ДА, то какие наркотики Вы употребляли (выберите все подходящие и обведите)

|   |                                                                         | <b>нет</b> | <b>да</b> |
|---|-------------------------------------------------------------------------|------------|-----------|
| А | алкоголь                                                                | 0          | 1         |
| Б | Героин и другие опиаты (кодеин, метадон, фентанил, «белый китаец»)      | 0          | 1         |
| В | Психостимуляторы (джеф, эфедрин, амфетамин, метамфетамин, кокаин, крэк) | 0          | 1         |
| Г | Коноплю (гашиш, марихуану)                                              | 0          | 1         |
| Д | Клубные наркотики (экстази, ЛСД, ПиСиПи, кетамин)                       | 0          | 1         |

Сейчас я попрошу Вас ответить на вопросы, касающиеся (ПАРТНЕР 5).

8. А. Это (ПАРТНЕР 5) мужчина или женщина?

мужчина 1  
женщина 2

Б. Есть ли у (ПАРТНЕР 5) ВИЧ?

Нет 1  
Да 2  
Не знаю 3

В. За последние 3 месяца, начиная с (ДАТА), сколько раз у Вас были вагинальные или анальные половые контакты с (ПАРТНЕР 5)? \_\_\_\_\_

Г. Из этих \_\_\_\_\_ раз, Вы или он(а) когда-либо использовали презервативы?

Нет 0  
Да 1

Д. Если да, то сколько раз Вы или он(а) использовали презервативы? \_\_\_\_\_

Е. За прошедшие 3 месяца говорили ли Вы с этим партнером о:

1. наличии у Вас ВИЧ

Нет 0  
Да 1

2. наличии ВИЧ у Вашего партнера

Нет 0  
Да 1

3. использовании презервативов

Нет 0  
Да 1

Сейчас я попрошу Вас подумать о **прошедших 30 днях до госпитализации**, когда у Вас были половые контакты с (ПАРТНЕР 5). Вспомните, пожалуйста, где Вы находились, что происходило, и ответьте, пожалуйста, на вопросы, относящиеся к этому времени.

Ж. Имелись ли у Вас половые контакты с (ПАРТНЕР 5) за последние 30 дней?

Нет 0 → ПЕРЕЙДИТЕ К ВОПРОСАМ В КОНЦЕ РАЗДЕЛА  
Да 1

З. Употребляли ли Вы алкоголь или наркотики перед или во время половых контактов за последние 30 дней (до госпитализации) ?

Нет 0 → ПЕРЕЙДИТЕ К ВОПРОСАМ В КОНЦЕ РАЗДЕЛА  
Да 1

И. Если ДА, то какие наркотики Вы употребляли (выберите все подходящие и обведите)

|   |                                                                         | нет | да |
|---|-------------------------------------------------------------------------|-----|----|
| А | алкоголь                                                                | 0   | 1  |
| Б | Героин и другие опиаты (кодеин, метадон, фентанил, «белый китаец»)      | 0   | 1  |
| В | Психостимуляторы (джеф, эфедрин, амфетамин, метамфетамин, кокаин, крэк) | 0   | 1  |
| Г | Коноплю (гашиш, марихуану)                                              | 0   | 1  |
| Д | Клубные наркотики (экстази, ЛСД, ПиСиПи, кетамин)                       | 0   | 1  |

Если было 6 и более половых партнеров, заполните следующие вопросы, в противном случае перейдите к вопросам, помеченным \*\*\*.

\*\*\*\*\*

**ВНИМАНИЕ:** ЗДЕСЬ ЗАКАНЧИВАЮТСЯ ВОПРОСЫ, КАСАЮЩИЕСЯ КАЖДОГО ИЗ ПАРТНЕРОВ. УТОЧНИТЕ У УЧАСТНИКА КОЛИЧЕСТВО ПОЛОВЫХ ПАРТНЕРОВ. СЛЕДУЮЩИЕ ВОПРОСЫ ЗАДАЮТСЯ ТОЛЬКО УЧАСТНИКАМ, ИМЕВШИМ БОЛЕЕ 5 ПОЛОВЫХ ПАРТНЕРОВ ЗА ПРОШЕДШИЕ 3 МЕСЯЦА. В ПРОТИВНОМ СЛУЧАЕ ПЕРЕЙДИТЕ К ВОПРОСУ №13.

\*\*\*\*\*

Эти вопросы завершают перечень вопросов, относящийся к вопросам о Ваших половых партнерах. Перечисленных в начале раздела. Сейчас, пожалуйста, ответьте на вопросы, относящиеся к оставшимся (КОЛИЧЕСТВО) партнерам, с которыми Вы имели половые контакты за **последние 3 месяца**, начиная с (ДАТА).

- 9 а. Сколько из этих партнеров было женщин? \_\_\_\_\_  
б. Сколько из этих партнеров было мужчин? \_\_\_\_\_

10. Сколько половых контактов (анальных и вагинальных) было у Вас за прошедшие 3 месяца, начиная с (ДАТА), с этими людьми? \_\_\_\_\_ количество раз за последние 3 месяца

11. Из (ЧИСЛО КОНТАКТОВ) раз, использовали ли когда-либо Вы или Ваш партнер презервативы?

|     |   |
|-----|---|
| Нет | 0 |
| Да  | 1 |

12. если да, то сколько раз Вы пользовались презервативами? \_\_\_\_\_

**\*\*\*Вопросы, касающиеся прошедших 30 дней до госпитализации\*\*\* (отвечают все пациенты)**

Сейчас я бы хотел, чтобы Вы вспомнили все половые контакты со всеми партнерами за последние 30 дней (для стационарных пациентов - до госпитализации). (ПОКАЖИТЕ КАЛЕНДАРЬ)

13. За последние 30 дней (до госпитализации), начиная с (ДАТА), сколько всего у Вас было анальных и вагинальных половых контактов? \_\_\_\_\_

14. Из (ЧИСЛО КОНТАКТОВ) раз, пользовались ли Вы когда-либо презервативами?

|     |   |
|-----|---|
| Нет | 0 |
| Да  | 1 |

15. если да, то сколько раз Вы пользовались презервативами? \_\_\_\_\_

**Коммерческий секс (отвечают все пациенты)**

16. Сколько раз за прошедшие 3 месяца Вы вступали в половой контакт, чтобы получить наркотики? (ПОКАЖИТЕ КАРТОЧКУ №8)

|                           |   |
|---------------------------|---|
| Ни разу                   | 0 |
| Несколько раз             | 1 |
| Несколько раз в месяц     | 2 |
| Один и более раз в неделю | 3 |

**17.** Сколько раз за прошедшие 3 месяца Вы давали наркотики, чтобы вступить в половой контакт с этим человеком? (ПОКАЖИТЕ КАРТОЧКУ №8)

|                           |   |
|---------------------------|---|
| Ни разу                   | 0 |
| Несколько раз             | 1 |
| Несколько раз в месяц     | 2 |
| Один и более раз в неделю | 3 |

**18.** Сколько раз за прошедшие 3 месяца **Вам** платили деньги, чтобы вступить с Вами в половой контакт? (ПОКАЖИТЕ КАРТОЧКУ №8)

|                           |   |
|---------------------------|---|
| Ни разу                   | 0 |
| Несколько раз             | 1 |
| Несколько раз в месяц     | 2 |
| Один и более раз в неделю | 3 |

**19.** Сколько раз за прошедшие 3 месяца **Вы** платили деньги, чтобы вступить с кем-либо в половой контакт? (ПОКАЖИТЕ КАРТОЧКУ №8)

|                           |   |
|---------------------------|---|
| Ни разу                   | 0 |
| Несколько раз             | 1 |
| Несколько раз в месяц     | 2 |
| Один и более раз в неделю | 3 |

## **Раздел Е. Стигматизация ВИЧ**

Berger BE, Ferrans CE, Lashley FR. Measuring stigma in people with HIV: psychometric assessment of the HIV stigma scale. *Research in Nursing and Health*. 2001;24:518-529.

## **Раздел К. Депрессия**

Beck AT. Beck Depression Inventory - second edition. Copyright 1996 Aaron T. Beck. Russian translation copyright 2007 Aaron T. Beck. Pearson Education, Inc.)

## Раздел М. Употребление алкоголя за последние 30 дней

Сейчас я задам вопросы об употреблении Вами алкоголя. Сколько мл каждого из перечисленных спиртных напитков (пиво (П), вино (В), крепкие напитки (К)) Вы употребляли в течение каждого дня за последние 30 дней до госпитализации?

|           |           |           |           |           |           |           |
|-----------|-----------|-----------|-----------|-----------|-----------|-----------|
| <b>1</b>  | <b>2</b>  | <b>3</b>  | <b>4</b>  | <b>5</b>  | <b>6</b>  | <b>7</b>  |
| П         | П         | П         | П         | П         | П         | П         |
| В         | В         | В         | В         | В         | В         | В         |
| К         | К         | К         | К         | К         | К         | К         |
|           |           |           |           |           |           |           |
| <b>8</b>  | <b>9</b>  | <b>10</b> | <b>11</b> | <b>12</b> | <b>13</b> | <b>14</b> |
| П         | П         | П         | П         | П         | П         | П         |
| В         | В         | В         | В         | В         | В         | В         |
| К         | К         | К         | К         | К         | К         | К         |
|           |           |           |           |           |           |           |
| <b>15</b> | <b>16</b> | <b>17</b> | <b>18</b> | <b>19</b> | <b>20</b> | <b>21</b> |
| П         | П         | П         | П         | П         | П         | П         |
| В         | В         | В         | В         | В         | В         | В         |
| К         | К         | К         | К         | К         | К         | К         |
|           |           |           |           |           |           |           |
| <b>22</b> | <b>23</b> | <b>24</b> | <b>25</b> | <b>26</b> | <b>27</b> | <b>28</b> |
| П         | П         | П         | П         | П         | П         | П         |
| В         | В         | В         | В         | В         | В         | В         |
| К         | К         | К         | К         | К         | К         | К         |
|           |           |           |           |           |           |           |
| <b>29</b> | <b>30</b> | <b>31</b> |           |           |           |           |
| П         | П         | П         |           |           |           |           |
| В         | В         | В         |           |           |           |           |
| К         | К         | К         |           |           |           |           |

## Раздел О. Употребление наркотиков

### А. Употребление наркотиков

Сейчас я задам Вам вопросы, касающиеся употребления Вами наркотиков. Я спрошу, какие виды наркотиков Вы употребляли и как часто. Я знаю, что уже спрашивала Вас об употреблении наркотиков в прошлом, но я хотела бы еще раз быстро задать Вам вопросы об употреблении следующих видов наркотиков, Это поможет нам ответить на многие вопросы.

1. Употребляли ли Вы когда-нибудь (в виде инъекций, вдыхали, курили, глотали)

**Если да, употребляли ли за последние 30 дней**

|                                                                                                     | <b>нет</b> | <b>да</b> | <b>нет</b> | <b>да</b> |
|-----------------------------------------------------------------------------------------------------|------------|-----------|------------|-----------|
| 1 Героин (не в комбинации с другими наркотиками)                                                    | 0          | 1         | 0          | 1         |
| 2 другие опиаты (кодеин, метадон, фентанил, «белый китаец») (не в комбинации с другими наркотиками) | 0          | 1         | 0          | 1         |
| 3 Джеф или эфедрин (не в комбинации с другими наркотиками)                                          | 0          | 1         | 0          | 1         |
| 4 Амфетамины или метамфетамины (не в комбинации с другими наркотиками)                              | 0          | 1         | 0          | 1         |
| 5 Кокаин или крэк (не в комбинации с другими наркотиками)                                           | 0          | 1         | 0          | 1         |
| 6 Комбинацию героина и стимуляторов (джеф, амфетамина, метамфетамина, эфедрина, кокаина или крэка)  | 0          | 1         | 0          | 1         |
| 7 Коноплю (гашиш, марихуану)                                                                        | 0          | 1         | 0          | 1         |
| 8 Клубные наркотики (экстази, ЛСД, ПиСиПи, кетамин)                                                 | 0          | 1         | 0          | 1         |



## Б. Частота употребления наркотиков

Внимание: Для каждого из наркотиков, когда-либо использовавшегося в вопросе 1, задайте следующие вопросы: (1-4). Если в вопросе 1 все ответы отрицательные, перейдите к разделу В. Для стационарных пациентов: эти вопросы касаются периода времени за 30 дней до госпитализации.

Для амбулаторных пациентов: эти вопросы касаются последних 30 дней.

Если ответ отрицательный,  
впишите «00»  
Если не уверен, впишите «77»  
Если отказался отвечать,  
впишите «88»

1. Сколько дней Вы  
употребляли \_\_\_ за  
последние 30 дней?

(если ответ отрицательный, пропустите  
вопросы Б-Д для данного наркотика и  
переходите к следующему наркотику,  
который употреблял пациент)

2. Сколько дней Вы  
употребляли \_\_\_ в виде  
инъекций за последние 30  
дней?

3. Сколько раз в день Вы  
делали инъекции \_\_\_?  
(среднее число инъекций в  
день)

4. Сколько раз в день Вы  
употребляли \_\_\_ не в виде  
инъекций? (в среднем в  
день)

|                                                                                          | <b>А.<br/>Героин и<br/>другие<br/>опиаты</b> | <b>Б.<br/>Стимуляторы (джеф,<br/>эфедрин, амфетамин,<br/>метамфетамин, кокаин,<br/>крэк)</b> | <b>В.<br/>Конопля</b> | <b>Г.<br/>Клубные<br/>наркотики</b> |
|------------------------------------------------------------------------------------------|----------------------------------------------|----------------------------------------------------------------------------------------------|-----------------------|-------------------------------------|
| 1. Сколько дней Вы<br>употребляли ___ за<br>последние 30 дней?                           | ___                                          | ___                                                                                          | ___                   | ___                                 |
| 2. Сколько дней Вы<br>употребляли ___ в виде<br>инъекций за последние 30<br>дней?        | ___                                          | ___                                                                                          | X                     | ___                                 |
| 3. Сколько раз в день Вы<br>делали инъекции ___?<br>(среднее число инъекций в<br>день)   | ___                                          | ___                                                                                          | X                     | ___                                 |
| 4. Сколько раз в день Вы<br>употребляли ___ не в виде<br>инъекций? (в среднем в<br>день) | ___                                          | ___                                                                                          | ___                   | ___                                 |

## **В. Инъекционное употребление наркотиков.**

Иногда люди попадают в ситуации, когда им трудно воздержаться от обмена иглами. Они могут торопиться ввести наркотик для улучшения самочувствия. Они могут приехать в другой район города за наркотиком и не иметь при себе необходимых инструментов, они могут вводить наркотик в небезопасном месте или скрываться от взглядов посторонних.

\_\_\_ \_\_ 1. Сколько раз за прошедшие 30 дней Вы делали инъекции наркотиков? (**если не было инъекционного употребления наркотиков за прошедшие 30 дней, перейдите к следующему разделу**).

\_\_\_ \_\_ 2. Из числа инъекций за прошедшие 30 дней, сколько раз Вы использовали чистые новые иглы/шприцы, которыми никто не пользовался, и **Вы об этом знали?** (укажите число инъекций)

\_\_\_ \_\_ 3. Из числа инъекций за прошедшие 30 дней, сколько раз Вы использовали иглы/шприцы, которыми кто-то уже пользовался, и **Вы об этом знали?** (укажите число инъекций)

**Внимание: Число в вопросе №1 должно быть  $\geq$  суммы чисел в вопросах №2 и 3. Если это не так, пожалуйста, уточните эти вопросы еще раз.**

\_\_\_ \_\_ 4. Из числа инъекций (вопрос 3), когда Вы пользовались уже использованными иглами/шприцами, сколько раз Вы или кто-то другой промывали жидкостью (водой или отбеливателем) эти иглы/шприцы перед использованием? (укажите количество раз)

\_\_\_ \_\_ 5. Сколько раз за прошедшие 30 дней Вы использовали ложки/вату/воду, которые уже кто-то пользовался?

\_\_\_ \_\_ 6. Сколько раз за последние 30 дней Вы готовили наркотик вместе с другим человеком и делили готовый раствор, используя одни и те же ложки и шприцы для дозирования?

\_\_\_ \_\_ 7. Сколько раз за последние 30 дней Вы разрешали кому-либо использовать после себя шприц/иглу?

\_\_\_ \_\_ 8. Из числа раз, когда Вы разрешали использовать после себя иглу/шприц, сколько раз Вы промывали иглу/шприц, перед тем, как отдать их?

Сейчас я задам несколько вопросов о веществах, которые вы могли употреблять перед инъекциями наркотиков только за последние 30 дней.

**Внимание: пропустите вопросы, касающиеся наркотиков, которые не употреблял участник за последние 30 дней. Обязательно задайте вопросы про употребление алкоголя.**

Если ответ отрицательный, впишите «00»  
Если не уверен, впишите «77»  
Если отказался отвечать, впишите «88»

| <b>А.</b>                                 | <b>Б.</b>                                                                                     | <b>В.</b>      | <b>Г.</b>                    | <b>Д.</b>       |
|-------------------------------------------|-----------------------------------------------------------------------------------------------|----------------|------------------------------|-----------------|
| <b>Героин<br/>и<br/>другие<br/>опиаты</b> | <b>Стимуляторы<br/>(джеф,<br/>эфедрин,<br/>амфетамин,<br/>метамфетамин,<br/>кокаин, крэк)</b> | <b>Конопля</b> | <b>Клубные<br/>наркотики</b> | <b>Алкоголь</b> |

9. Сколько раз  
Вы употребляли  
\_\_\_\_\_ *перед*  
*инъекцией*  
наркотика за  
последние 30  
дней?

\_\_\_

10. Сколько раз  
Вы употребляли  
\_\_\_\_\_ *перед тем,*  
*как обменяться*  
*иглами/шприцами*  
*(использовали*  
*иглы/шприц*  
*после кого-то,*  
*давали другому*  
*свои иглы/шприц)*  
за последние 30  
дней?

\_\_\_

## Раздел II. Взаимодействие с правоохранительными органами

Случалось ли с Вами когда-нибудь следующее?

|   |                                                                                                  | нет | да |
|---|--------------------------------------------------------------------------------------------------|-----|----|
| А | Милиционеры отбирали у Вас шприцы                                                                | 0   | 1  |
| Б | Вас арестовывали за наличие шприцев                                                              | 0   | 1  |
| В | Покупали новые шприцы в аптеке                                                                   | 0   | 1  |
| Г | Решали не покупать новые шприцы в аптеке, потому что боялись, что можете быть задержаны милицией | 0   | 1  |
| Д | Вас арестовывали после того, как милиционеры подбрасывали Вам шприцы или наркотики               | 0   | 1  |
| Е | Вас вынуждали давать деньги милиционерам, чтобы Вас не арестовывали                              | 0   | 1  |
| Ж | Вас принуждали вступать в половые контакты с милиционером                                        | 0   | 1  |

## Раздел Р. Передозировки

**Следующие вопросы касаются передозировок. Под передозировкой мы понимаем любое превышение дозы наркотика, выписанного препарата или алкоголя, включая случайное или преднамеренное.**

1. Были ли у Вас **когда-либо** передозировки?

нет 0 (перейдите к следующему разделу)

да 1

2. Сколько раз у Вас были передозировки? (число раз) \_\_\_\_ \_\_\_\_

3. Приходилось ли Вам вызывать скорую помощь или другую медицинскую помощь по поводу передозировки?

нет 0

да 1

4. Приходилось ли Вам вызывать скорую помощь или другую медицинскую помощь по поводу последней передозировки?

нет 0

да 1

5. Была ли последняя передозировка попыткой суицида?

нет 0

да 1

6. Были ли у Вас передозировки за последние 3 месяца?

нет 0 (перейдите к следующему разделу)

да 1

6а. Сколько раз у Вас были передозировки за последние 3 месяца? (число раз) \_\_\_\_ \_\_\_\_

## Раздел С. Суициды

Сейчас я задам Вам несколько вопросов об эмоциональных переживаниях и чувствах, которые Вы, возможно, испытывали.

### 1. В течение жизни...

|   |                                                                                                                                                 | В течение жизни |         | За последние 3 месяца |         |
|---|-------------------------------------------------------------------------------------------------------------------------------------------------|-----------------|---------|-----------------------|---------|
|   |                                                                                                                                                 | НЕТ<br>0        | ДА<br>1 | НЕТ<br>0              | ДА<br>1 |
| а | Посещали ли Вас серьезные мысли о том, чтобы покончить жизнь самоубийством?<br>ЕСЛИ ДА, СПРОСИТЕ, ПОЯВЛЯЛИСЬ ЛИ ЭТИ МЫСЛИ ЗА ПОСЛЕДНИЕ 3 МЕСЯЦА | 0               | 1       | 0                     | 1       |
| б | Предпринимали ли Вы когда-нибудь попытку самоубийства?<br>ЕСЛИ ДА, СПРОСИТЕ, БЫЛИ ЛИ ПОПЫТКИ САМОУБИЙСТВА ЗА ПОСЛЕДНИЕ 3 МЕСЯЦА                 | 0               | 1       | 0                     | 1       |

**ВНИМАНИЕ:** ЕСЛИ НЕ БЫЛО МЫСЛЕЙ И ПОПЫТОК В ТЕЧЕНИЕ ЖИЗНИ, ПЕРЕЙДИТЕ К СЛЕДУЮЩЕМУ РАЗДЕЛУ.  
ЕСЛИ БЫЛИ ТОЛЬКО ПОПЫТКИ ИЛИ МЫСЛИ В ТЕЧЕНИЕ ЖИЗНИ, ПЕРЕЙДИТЕ К ВОПРОСУ 3.  
В ОСТАЛЬНЫХ СЛУЧАЯХ ПЕРЕЙДИТЕ К ВОПРОСУ 2.

2. Сколько попыток самоубийства было за прошедшие 3 месяца? (ПОКАЖИТЕ КАРТОЧКУ № 11)

|                 |   |
|-----------------|---|
| Однократно      | 1 |
| Дважды          | 2 |
| Три и более раз | 3 |

3. Употребляли ли Вы во время последней попытки самоубийства...?

|   |                                                                      | нет<br>0 | да<br>1 |
|---|----------------------------------------------------------------------|----------|---------|
| А | алкоголь                                                             | 0        | 1       |
| Б | героин или другие опиаты (кодеин, метадон, фентанил, «белый китаец») | 0        | 1       |
| В | Стимуляторы (джеф, эфедрин, амфетамин, метамфетамин, кокаин, крэк)   | 0        | 1       |
| Г | Коноплю (гашиш, марихуану)                                           | 0        | 1       |
| Д | Клубные наркотики (экстази, ЛСД, ПиСиПи, кетамин)                    | 0        | 1       |

## **Раздел Ф. SF-12v2™ Оценка здоровья**

Ware JE Jr, Kosinski M, Turner-Bowker DM, Gandek B. How to score version 2 of the SF-12 health survey. Lincoln, RI: QualityMetric Incorporated, 2002.

Ware JE, Kosinski M, Turner-Bowker D, Gandek B. User's Manual for the SF-12v2™ Health Survey with a Supplement Documenting SF-12® Health Survey. Lincoln, RI: QualityMetric Incorporated, 2002.
